# Supplementary material
Source: PubMed Central journal article supplement (PMC6035355)
Supplement: mmc1.pdf [file mmc1.pdf]

**YMTHE, Volume 26**

**Supplemental Information**

**Posttranscriptional Regulation  
of Interleukin-33 Expression  
by MicroRNA-200 in Bronchial Asthma**

**Xin Tang, Feng Wu, Jinshuo Fan, Yang Jin, Jianjun Wang, and Guanghai Yang**

Supplemental Figure 1. Histology staining of the lungs for allergic airway inflammation from the two independent asthma models including OVA (A) and A.fumigatus (B) induced experimental asthma in mice.

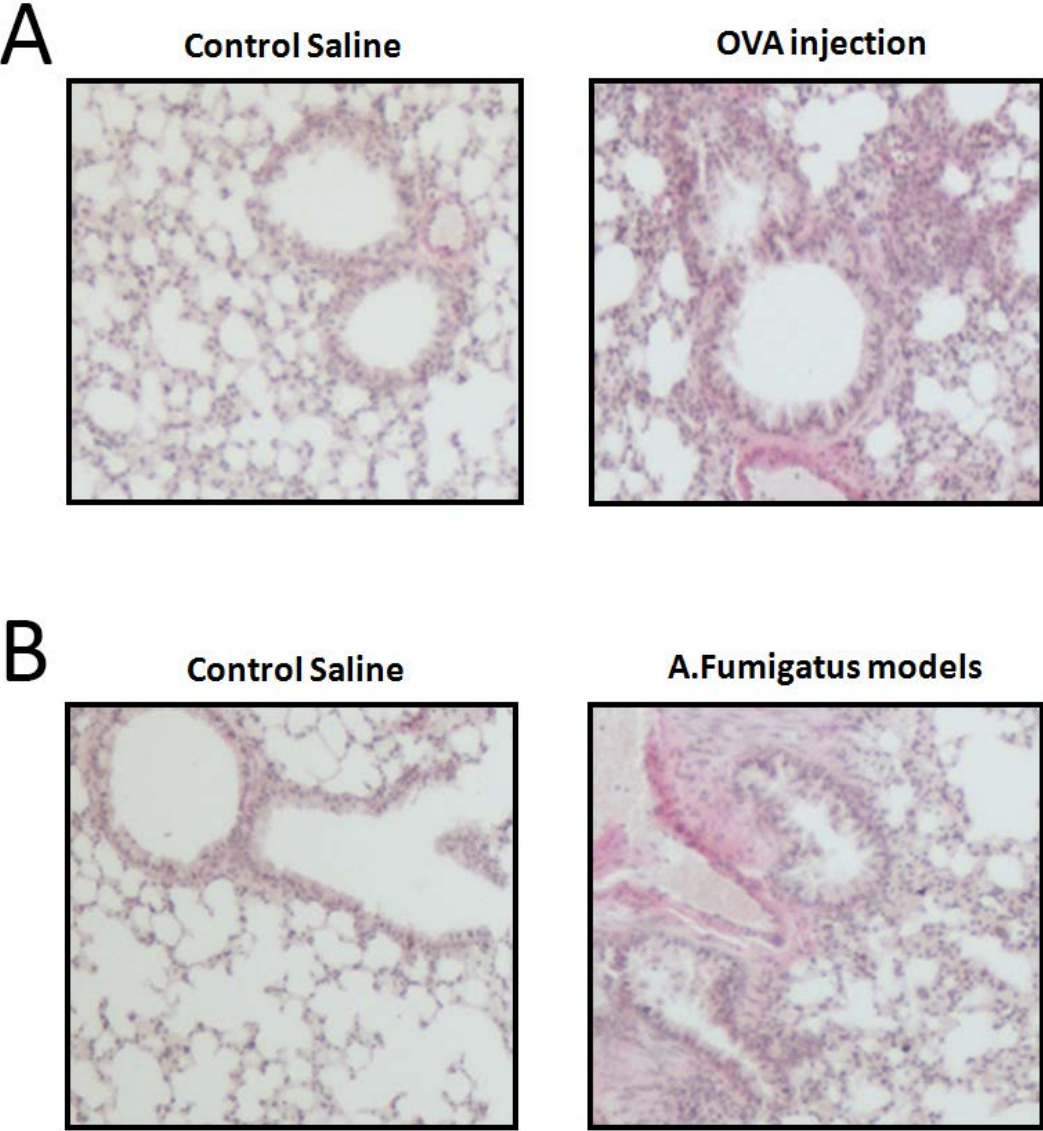

Supplemental Figure 2. Western blot shown the activities of full-length mouse and mature mouse forms of IL-33 of in vivo lung tissues.

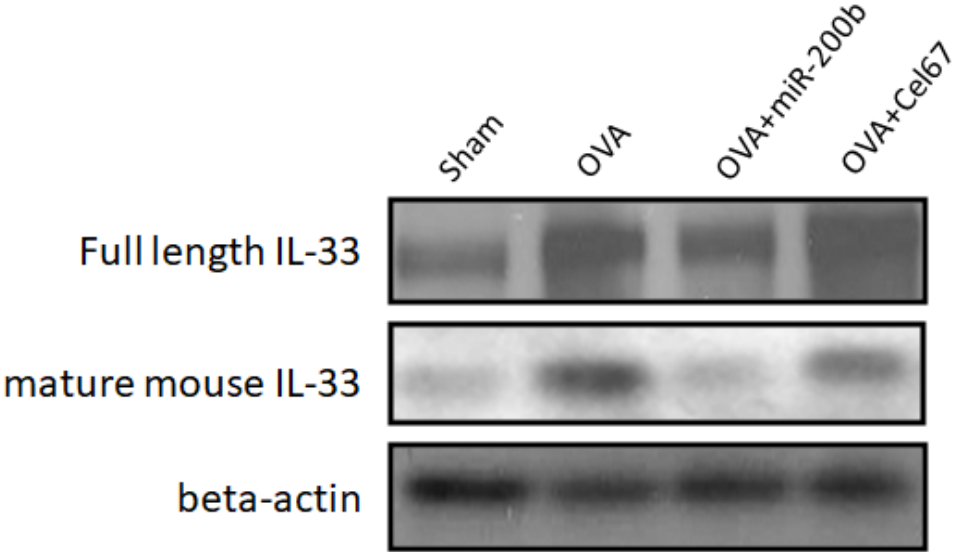

Supplemental Figure 3. A. Real-time PCR shown that IL33 mRNA of the lungs in LentimiRa-GFP-siRNA mIL33 virus infected animals compared to negative controls. B. HE staining of the lungs from LentimiRa-GFP-siRNA mIL33 virus and control virus infected animals. Data are presented as the mean  $\pm$  standard deviation (n=3). \*\* P<0.01 (Student unpaired and two-tailed t test).

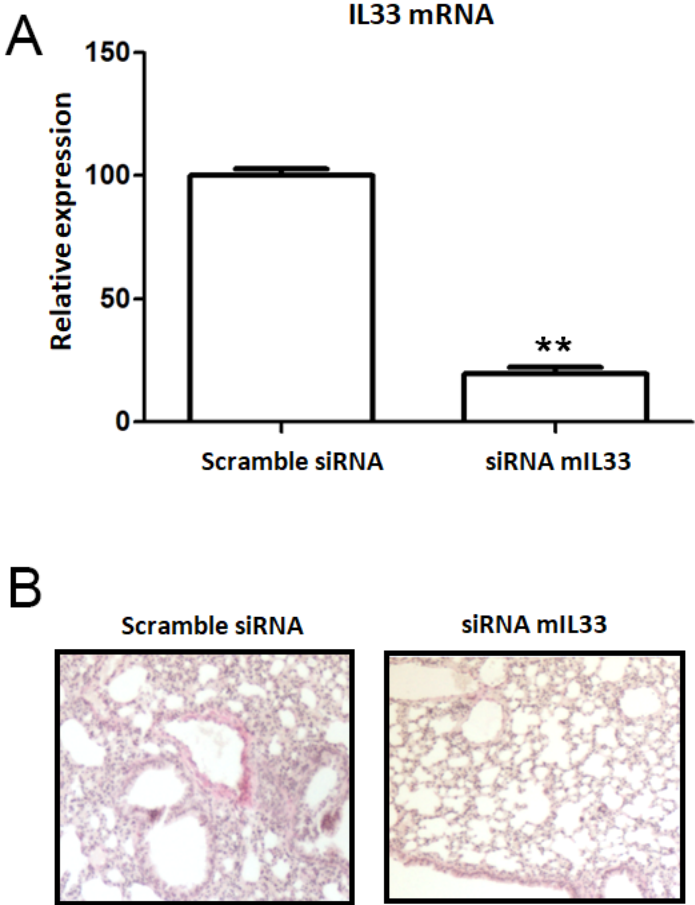

Supplemental Table 1. BAL fluid cell differentials of asthmatic patients and healthy controls.

| Variables            | Asthmatic patients | Healthy controls | p value |
|----------------------|--------------------|------------------|---------|
| Cell count, cells/uL | 156 ± 56           | 142 ± 29         | 0.59    |
| Macrophages, %       | 82.3 ± 15.2        | 88.7 ± 12.3      | 0.72    |
| Neutrophils, %       | 5.3 ± 2.1          | 3.3 ± 1.5        | 0.35    |
| Lymphocytes, %       | 6.5 ± 2.5          | 5.3 ± 2.3        | 0.49    |
| Other, %             | 5.9 ± 2.6          | 2.5 ± 1.4        | 0.22    |
